# Supplementary material
Source: Springer Nature journal article supplement (https://www.springermedizin.de/resource/supplementary/13023_2014_784_MOESM1_ESM.pdf/9643064)

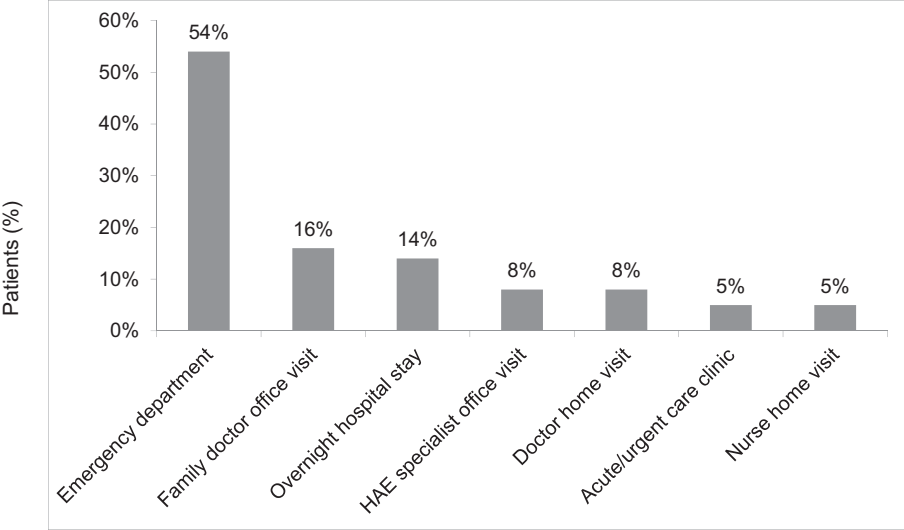

Supplement: MOESM1 [file 9643064]
